# Supplementary material
Source: publisher site journal article supplement (https://www.dovepress.com/article/515833)
Supplement: Supplementary file 1 [file 515833%20Supplementary%20Tables%201-2.docx]

Supplement 1. Comparison of anxiety and depression scores between emergency and elective PCI.

| Psychological scores | Emergency PCI (Median (IQR)) | Elective PCI (Median (IQR)) | *P*-value |
| --- | --- | --- | --- |
| Anxiety score | 5.0(6.0) | 3.0(6.0) | 0.006 |
| Depression score | 5.0(7.0) | 4.0(6.0) | 0.061 |

Supplement 2. Multivariate linear analysis comparing performance between full ACEF score and modified score excluding creatinine for the association among ACEF score and post-PCI anxiety, depression score.

|  | Anxiety score | | Depression score | |
| --- | --- | --- | --- | --- |
| *β*(95%CI) | *P* | *β*(95%CI) | *P* |
| ACEF score | 3.503(1.364-5.641) | 0.001 | 3.452(0.926-5.987) | 0.008 |
| Modified ACEF score | 4.507(2.161-6.853) | < 0.001 | 4.264(1.432-7.097) | 0.003 |

Notes: adjusted for age, sex, Education level, Killip, Aspirin, Diuretics, Smoking, Hypertension, Diabetes mellitus
